# Supplementary material
Source: PubMed Central journal article supplement (PMC3030335)

# Supplemental Figure 1-Horn et al.

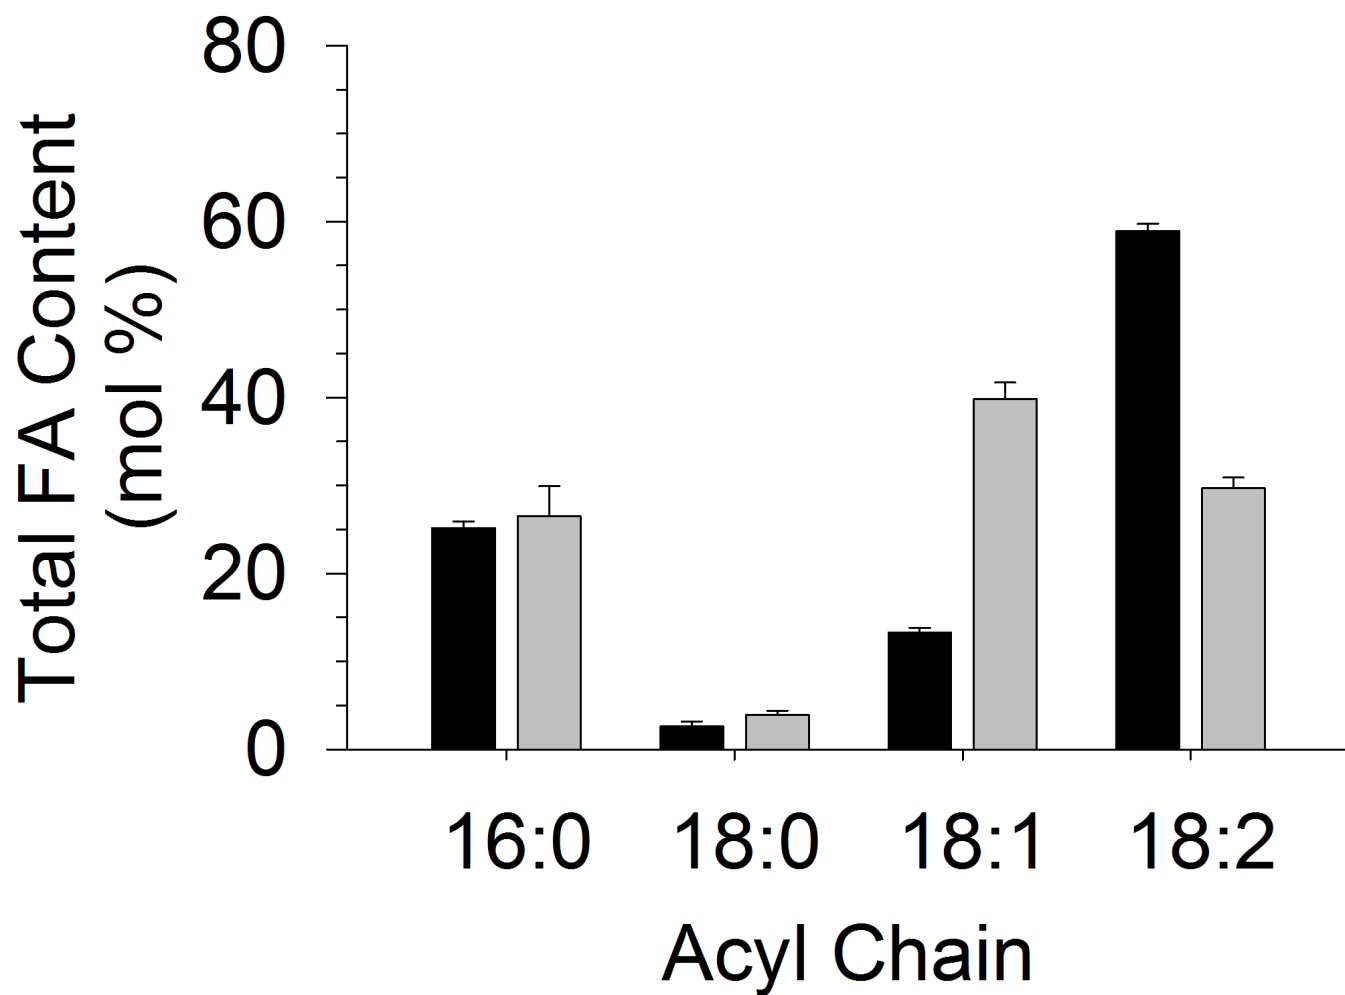

Supplement: supp_M110.186353_jbc.M110.186353-1.pdf [file supp_M110.186353_jbc.M110.186353-1.pdf]
